# Supplementary material
Source: PubMed Central journal article supplement (PMC10015534)
Supplement: 41443_2023_687_MOESM2_ESM.pdf [file 41443_2023_687_MOESM2_ESM.pdf]

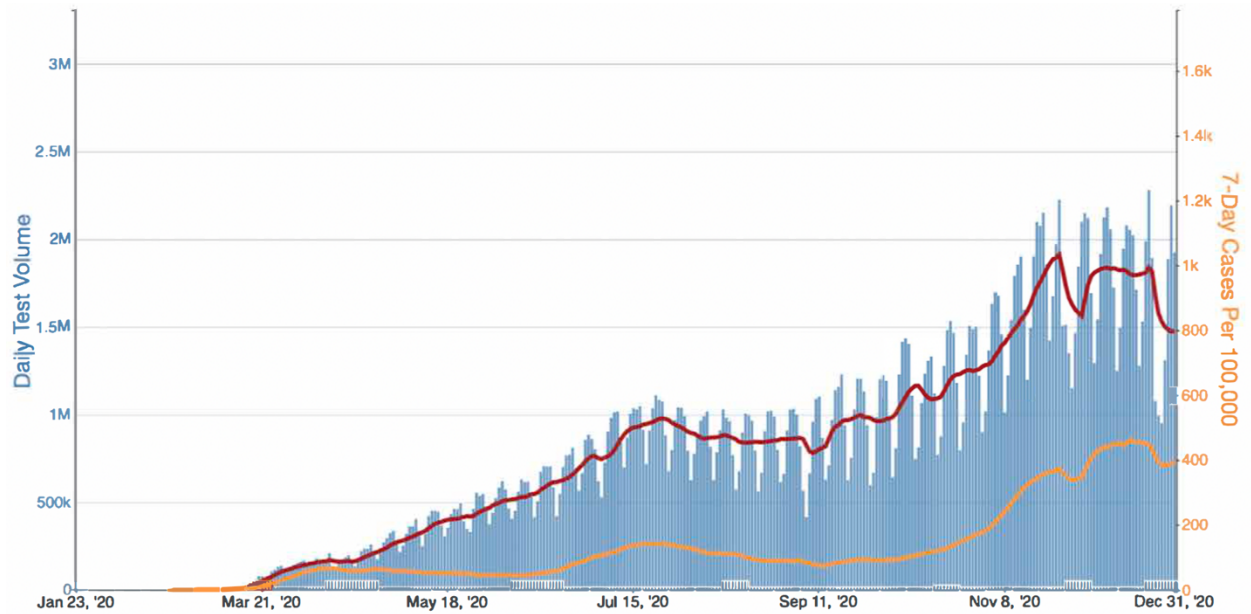

**Supplemental Figure 2.** Daily COVID-19 testing volume and 7-Day cumulative incidence rate of COVID-19 cases in the United States as reported to the CDC, per 100,000 population in 2020.
