# Supplementary material
Source: PubMed Central journal article supplement (PMC10015534)
Supplement: 41443_2023_687_MOESM3_ESM.pdf [file 41443_2023_687_MOESM3_ESM.pdf]

**Supplement table 1.** Exposure and outcome ICD 9 & 10 diagnosis codes.

| <b>Exposure</b>          | <b>ICD 9</b> | <b>ICD 10</b>                                                                                     |
|--------------------------|--------------|---------------------------------------------------------------------------------------------------|
| COVID 19 Infection       |              | U07.1<br>J12.82<br>U09.9                                                                          |
| <b>Outcomes Excluded</b> | <b>ICD 9</b> | <b>ICD 10</b>                                                                                     |
| ED following GU Surgery  |              | 52.31<br>52.32<br>52.33<br>52.34                                                                  |
| ED following Radiation   |              | N52.35<br>N52.36<br>N52.37                                                                        |
| <b>Primary Outcome</b>   | <b>ICD 9</b> | <b>ICD 10</b>                                                                                     |
| Erectile Dysfunction     | 607.84       | 52.01<br>52.1<br>52.2<br>52.9<br>52.02<br>52.8<br>52.39<br>52.03<br>F52.21<br>53.9<br>53.8<br>R37 |

**Supplement table 1.** Associated ICD 10 diagnosis codes for COVID 19 (exposure), ICD 10 diagnosis codes excluded from study protocol (ED following Radiation or GU surgery), and ICD 9 & 10 ICD codes used to identify primary diagnosis of erectile dysfunction (Primary outcome).
