# Supplementary material
Source: PubMed Central journal article supplement (PMC10015534)

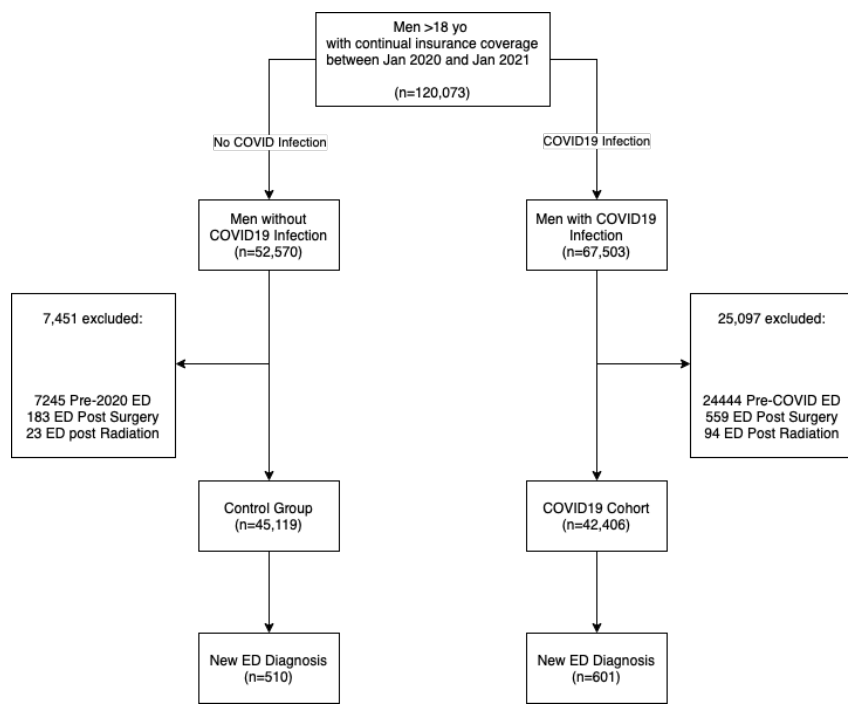

**Supplemental Figure 1.** Study protocol including inclusion and exclusion criteria.

Supplement: 41443_2023_687_MOESM1_ESM.pdf [file 41443_2023_687_MOESM1_ESM.pdf]
